# Supplementary material for: 2La Paracentric Chromosomal Inversion and Overexpressed Metabolic Genes Enhance Thermotolerance and Pyrethroid Resistance in the Major Malaria Vector Anopheles gambiae
Source: MDPI journal article supplement (doi:10.3390/biology10060518), 2021-06-10
Supplement: s1 [file s1]

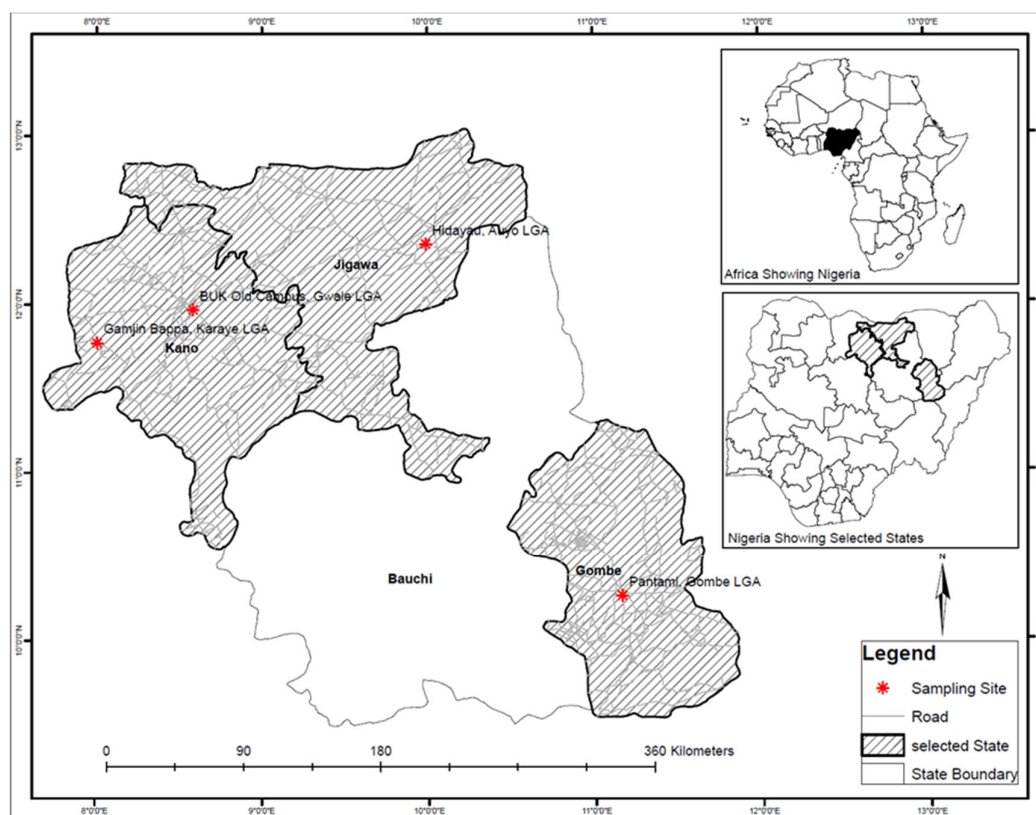

**Figure S1.** Map of the four sampling sites in northern Nigeria. Red star for BUK and Gamjin Bappa (Kano State), Auyo (Jigawa State) and Pantami (Gombe State).

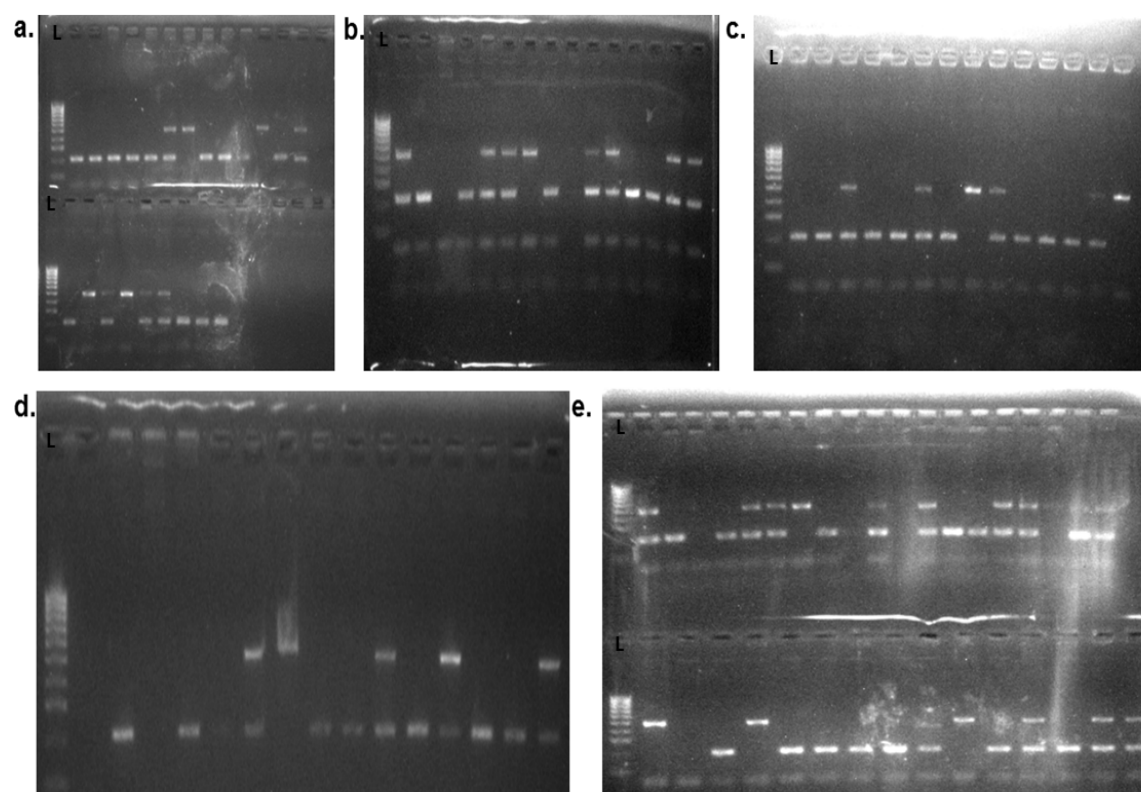

**Figure S2.** Agarose gel of 2La karyotyping using larvae from heat stress bioassay. **a.** top panel is for Auyo alive (lanes 1–13) while the lower panel is Auyo dead (lanes 1–9); **b.** BUK alive 1–13; **c.** BUK dead, 1–15; **d.** Gamjin Bappa alive (1–11) and dead (12 and 13); and **e.** Gamjin Bappa dead (1–3), Pantami alive (4–19) and Pantami dead (20–33). L is Bioline 100 bp DNA ladder ((100–1013 bp (40–200 ng/band))).

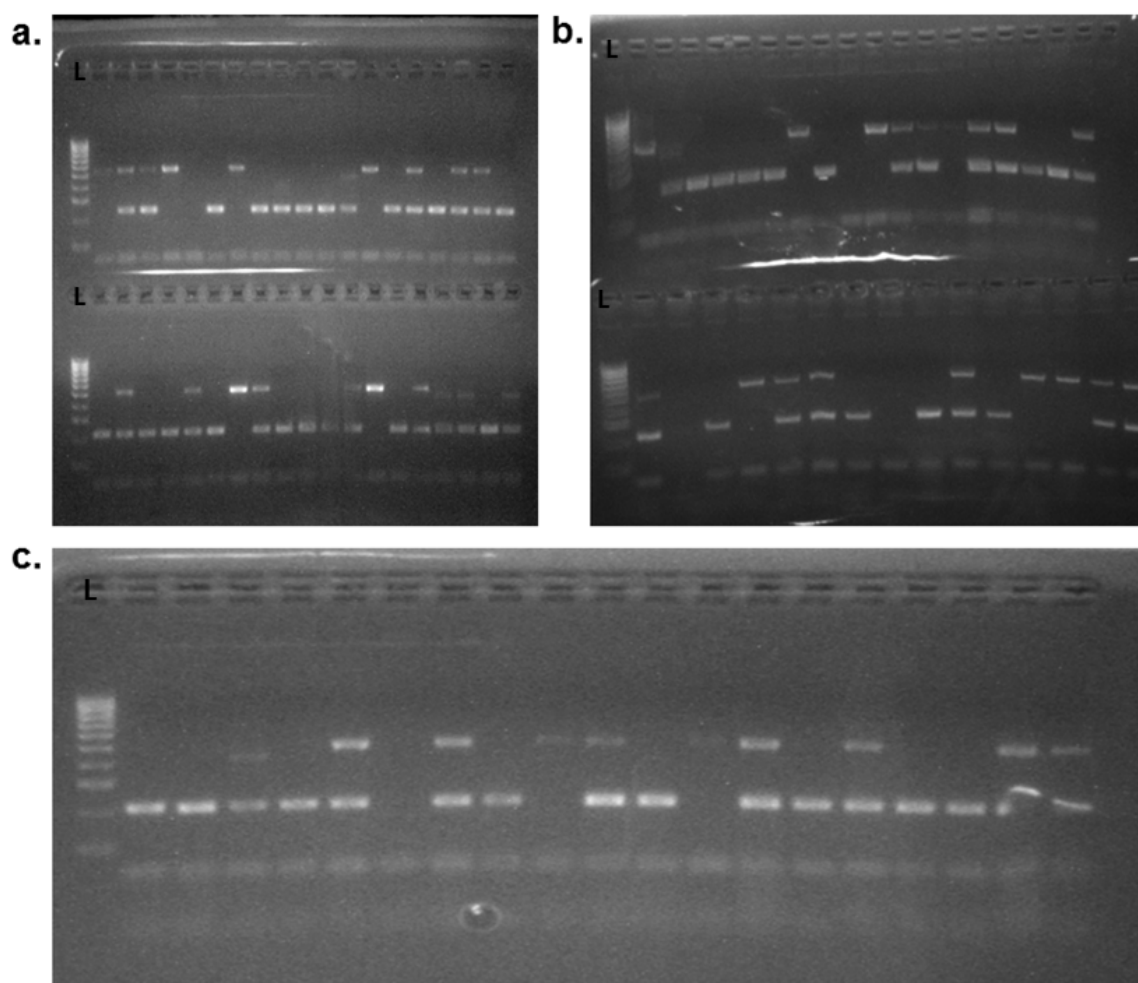

**Figure S3.** Agarose gel of 2La karyotyping using larvae from permethrin bioassay. **a.** BUK alive (lanes 1–9), BUK dead (10–20), Gamjin Bappa alive (21–26) and Gamjin Bappa dead (27–37); **b.** Pantami alive (1–15) and Pantami dead (16–30); **c.** Auyo alive 1–11 and Auyo dead 12–17. Number 18 not identified from species identification. L is Bioline 100 bp DNA ladder ((100–1013 bp (40–200 ng/band))).

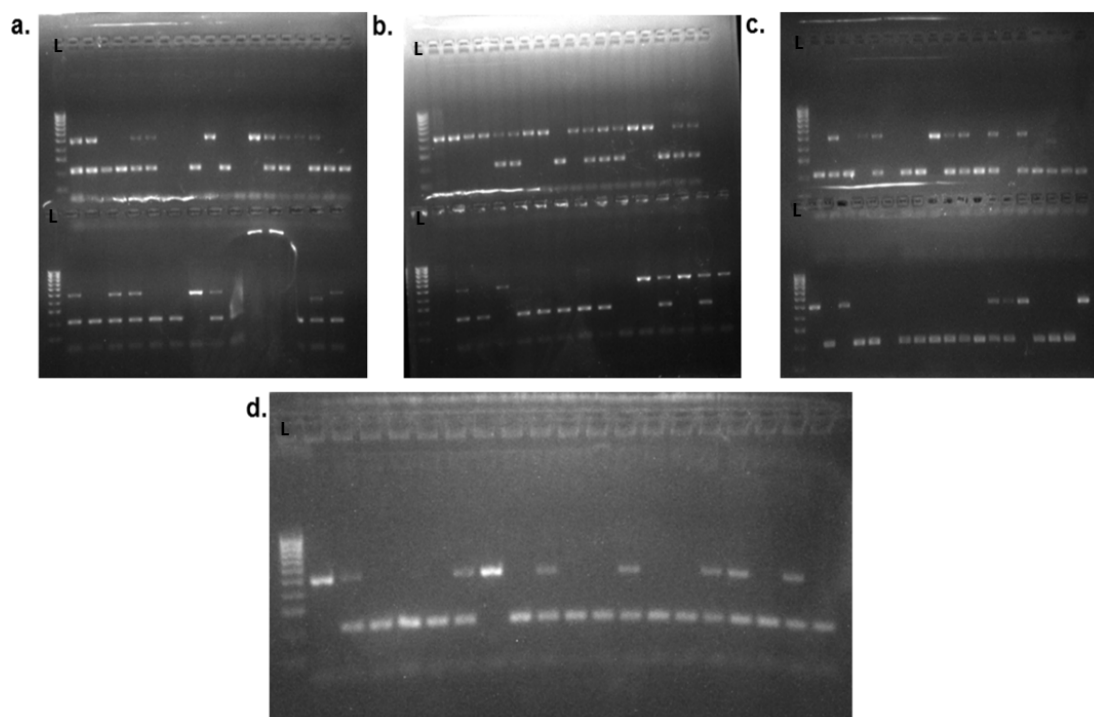

**Figure S4.** Agarose gel of 2La karyotyping using adult females from permethrin bioassay. **a.** Auyo alive (lanes 1–16), Auyo dead (17–28), BUK alive (29–31); **b.** BUK alive (1–19), BUK dead (20–29), Pantami alive (30); **c.** Pantami alive (1–16), Pantami dead (17–26), Gamjin Bappa dead (27–35); and **d.** Gamjin Bappa alive (1–19). L is Bioline 100 bp DNA ladder ((100–1013 bp (40–200 ng/band))).

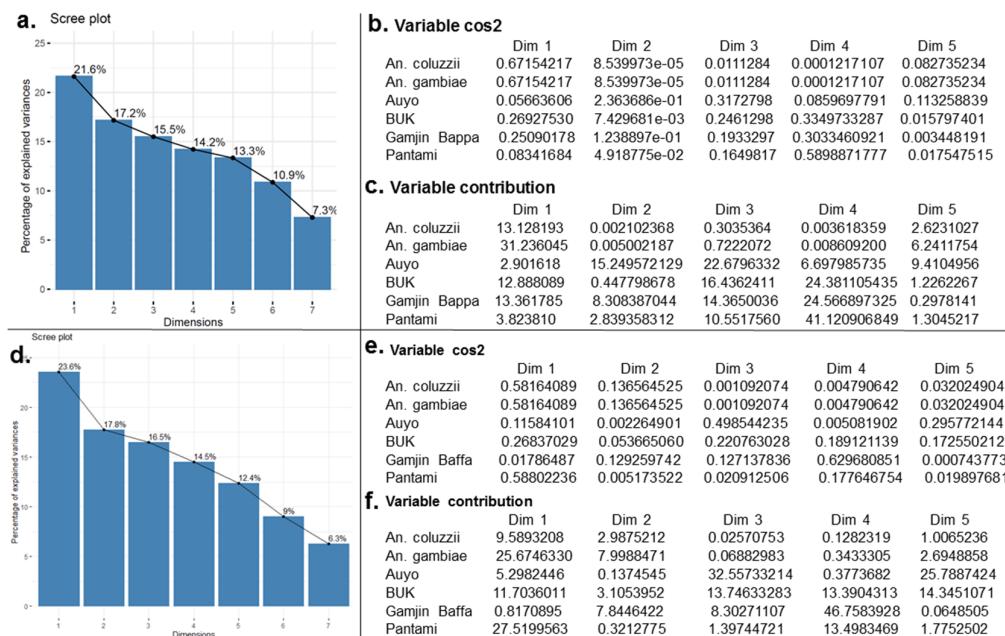

**Figure S5.** Relative contribution of variables on the factor map. **a., b.** and **c.** are Scree plot of the 7 dimensions, cos2 and variables contributions, respectively for dimensions 1–5, from heat stress bioassay. Highest values reflect highest contribution to the dimension (variability); **d., e.** and **f.** are Scree plot of the 7 dimensions, cos2 and variables contributions, respectively for dimensions 1–5, from adult bioassays with permethrin.

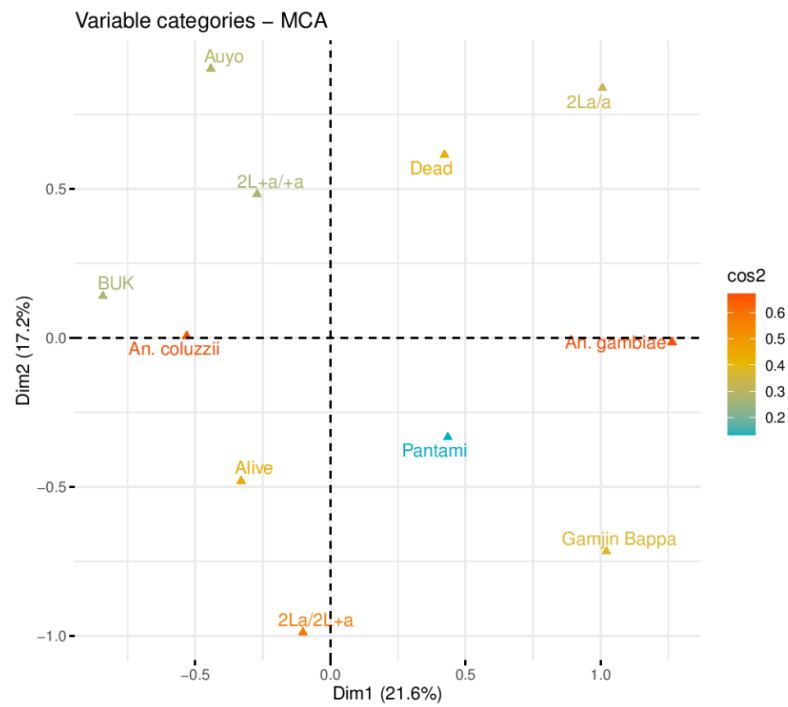

**Figure S6.** cos2 of variables with *An. coluzzii* and *An. gambiae* s.s. (*An. gambiae* in the plot) exhibiting the highest inertia/contribution.

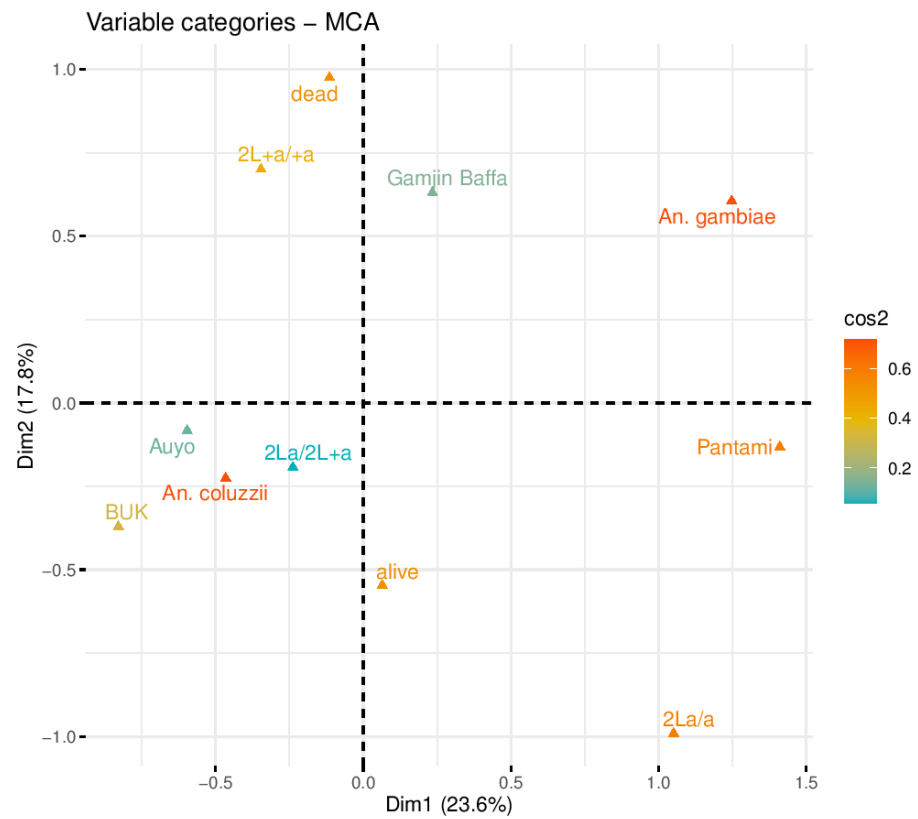

**Figure S7.** cos2 of the variables with *An. coluzzii* and *An. gambiae* s.s. (*An. gambiae* in the plot) exhibiting the highest inertia/contribution.

Table S1. Primers used for qRT-PCR.

| Gene Name                   | Gene ID    | Primer Name                                | Sequence (5'-3')                                  | Size (bp) | Efficiency |
|-----------------------------|------------|--------------------------------------------|---------------------------------------------------|-----------|------------|
| <i>hsp90</i>                | AGAP006959 | qhsp90_AGAP006959-F<br>qhsp90_AGAP006959-R | AAGCAGATCGTGAACAAGCA<br>GCCTTCATGATGCGCTCC        | 227       | 0.898      |
| <i>hsp90_beta</i>           | AGAP001424 | qhsp90_AGAP001424-F<br>qhsp90_AGAP001424-R | GCTGTGTGCGGTGGTAATTA<br>CTTGATGGCTTCCTCTTCGC      | 213       | 0.946      |
| <i>hsp83</i>                | AGAP006958 | qhsp83-F<br>qhsp83-R                       | CCTTCGCATTTCAGGCTGAG<br>GACTCCAGCTTCGAGGGATC      | 160       | 0.987      |
| <i>hsp70 1/8</i>            | AGAP004944 | qhsp70 1/8-F<br>qhsp70 1/8-R               | GAGATGCTGCCAAGAACCAG<br>GGCCGTTTCCTTCATCTTGG      | 239       | 0.898      |
| <i>hsp90 ATPase</i>         | AGAP010514 | qhsp_AGAP010514-F<br>qhsp_AGAP010514-R     | GGACATGGTGACCGCATTC<br>CCGGAATCATCGTTTGGGTC       | 239       | 0.892      |
| <i>hsp70</i>                | AGAP004581 | qhsp70-F<br>qhsp70-R                       | CGCAAGTTCAAGAAGGACGT<br>TCGAGCGGAACAGATCAGAG      | 199       | 0.974      |
| <i>TPS 1/2</i>              | AGAP008227 | qTPS1/2-F<br>qTPS1/2-R                     | CAGGAGGCACAAACCAAGAG<br>AGTTGGTGTGTTGTCCGTTG      | 237       | 0.932      |
| <i>IR21a</i>                | AGAP008511 | qIR21a-F<br>qIR21a-R                       | GTTGGAGATGCGGCTGTTG<br>AGAATCACCGCTACCCAGAC       | 300       | 0.971      |
| <i>IR25a</i>                | AGAP010272 | qIR25a-F<br>qIR25a-R                       | GCAATTATAGCGATCATGGGAC<br>AAGTGTGGCGGTCGATTTTC    | 245       | 0.817      |
| <i>Elongation factor Tu</i> | AGAP005128 | EF-F<br>EF-R                               | GGCAAGAGGCATAACGATCAATGCG<br>GTCCATCTGCGACGCTCCGG | 130       | 0.979      |
| <i>RPS7</i>                 | AGAP010592 | RPS7-F<br>RPS7-R                           | CCACCATCGAACACAAAGTTGA<br>TGCTGCAAACTTCGGCTATTC   | 98        | 0.897      |

Table S2. Summary of the 2La inversion distribution in larvae and adult *Anopheles* mosquitoes.

| Site / Phenotype                       | Karyotype |        |         | Total |
|----------------------------------------|-----------|--------|---------|-------|
| Heat stress assay (44 °C for 30 min)   |           |        |         |       |
| Auyo                                   |           |        |         |       |
|                                        | 2La/a     | 2La/+a | 2L+a/+a |       |
| Alive                                  | 2         | 2      | 9       | 13    |
| Dead                                   | 2         | 3      | 4       | 9     |
| BUK                                    |           |        |         |       |
| Alive                                  | 1         | 8*     | 5*      | 14    |
| Dead                                   | 2         | 2*     | 9*      | 13    |
| Gamjin Bappa 44 °C                     |           |        |         |       |
| Alive                                  | 1         | 4      | 7       | 12    |
| Dead                                   | 3         | 4      | 0       | 7     |
| Pantami                                |           |        |         |       |
| Alive                                  | 2         | 9      | 5       | 16    |
| Dead                                   | 3         | 4      | 7       | 14    |
| Larval bioassay (100 mg/mL Permethrin) |           |        |         |       |
| Auyo                                   |           |        |         |       |
| Alive                                  | 2         | 4      | 5       | 11    |
| Dead                                   | 0         | 3      | 3       | 6     |
| BUK                                    |           |        |         |       |
| Alive                                  | 3         | 2      | 4       | 9     |
| Dead                                   | 1         | 4      | 6       | 11    |

| Gamjin Bappa                       |                |   |                |    |
|------------------------------------|----------------|---|----------------|----|
| Alive                              | 1              | 2 | 3              | 6  |
| Dead                               | 1              | 5 | 5              | 11 |
| Pantami                            |                |   |                |    |
| Alive                              | 4              | 5 | 6              | 15 |
| Dead                               | 3              | 8 | 5              | 16 |
| Adult bioassay (0.75 % Permethrin) |                |   |                |    |
| Auyo                               |                |   |                |    |
| Alive                              | 3 <sup>†</sup> | 9 | 3 <sup>†</sup> | 15 |
| Dead                               | 1 <sup>†</sup> | 5 | 6 <sup>†</sup> | 12 |
| BUK                                |                |   |                |    |
| Alive                              | 4 <sup>†</sup> | 9 | 9 <sup>†</sup> | 22 |
| Dead                               | 0 <sup>†</sup> | 2 | 8 <sup>†</sup> | 10 |
| Gamjin Bappa                       |                |   |                |    |
| Alive                              | 5 <sup>†</sup> | 5 | 9 <sup>†</sup> | 19 |
| Dead                               | 0 <sup>†</sup> | 4 | 5 <sup>†</sup> | 9  |
| Pantami                            |                |   |                |    |
| Alive                              | 9 <sup>†</sup> | 4 | 2 <sup>†</sup> | 15 |
| Dead                               | 3 <sup>†</sup> | 4 | 3 <sup>†</sup> | 10 |

\* statistically significant between alive and dead for 2La/+<sup>a</sup> vs 2L<sup>+</sup>a/+<sup>a</sup> for BUK, OR = 7.2 (1.08 – 4.79),  $\chi^2 = 4.68$ ,  $p = 0.03$ .

<sup>†</sup> statistically significant between alive and dead for 2La/a vs 2L<sup>+</sup>a/+<sup>a</sup> for all sites, OR = 5.02 (1.48 – 6.93),  $\chi^2 = 7.45$ ,  $p = 0.01$ .

### Supplementary Information: Ambient temperature

Monthly averages of ambient temperature for the 4 sampling sites based on a statistical analysis of historical hourly weather reports and model reconstructions from 1 January 1980 to 31 December 2016. The weather-related data were taken entirely from NASA's MERRA-2 satellite-era reanalysis. This reanalysis combines a variety of wide-area measurements in a state-of-the-art global meteorological model to reconstruct the hourly history of weather throughout the world on a 50-kilometer grid (<https://weatherpark.com/> accessed on 6 June 2021).

#### Temperature

The hot season lasts for 2.3 months, from 17 March to 26 May, with an average daily high temperature above 37°C. The hottest day of the year is 13 April, with an average high of 39°C and low of 22°C.

The cool season lasts for 1.7 months, from 4 December to 28 January, with an average daily high temperature below 32°C. The coldest day of the year is 2 January, with an average low of 12°C and high of 30°C.

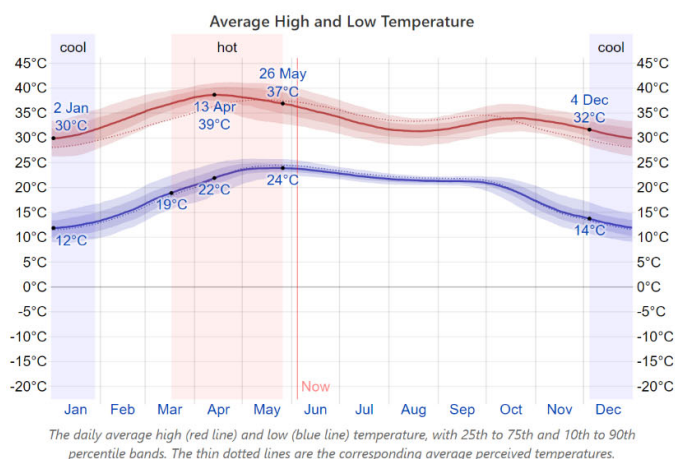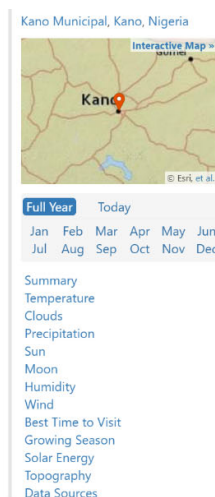

Temperature

The hot season lasts for 2.4 months, from 21 March to 1 June, with an average daily high temperature above 38°C. The hottest day of the year is 15 April, with an average high of 40°C and low of 25°C.

The cool season lasts for 1.7 months, from 9 December to 31 January, with an average daily high temperature below 32°C. The coldest day of the year is 3 January, with an average low of 15°C and high of 30°C.

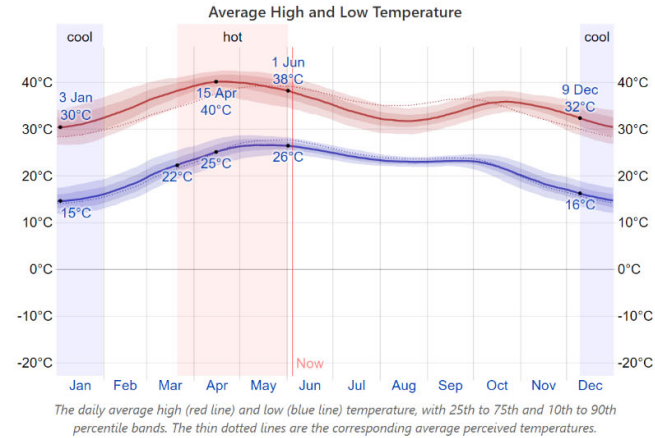

Auyo, Jigawa, Nigeria

Interactive Map

Full Year Today

| Jan | Feb | Mar | Apr | May | Jun |
|-----|-----|-----|-----|-----|-----|
| Jul | Aug | Sep | Oct | Nov | Dec |

Summary

- Temperature
- Clouds
- Precipitation
- Sun
- Moon
- Humidity
- Wind
- Best Time to Visit
- Growing Season
- Solar Energy
- Topography
- Data Sources

Temperature

The hot season lasts for 2.0 months, from 15 March to 16 May, with an average daily high temperature above 36°C. The hottest day of the year is 8 April, with an average high of 38°C and low of 22°C.

The cool season lasts for 1.9 months, from 30 November to 27 January, with an average daily high temperature below 31°C. The coldest day of the year is 2 January, with an average low of 12°C and high of 29°C.

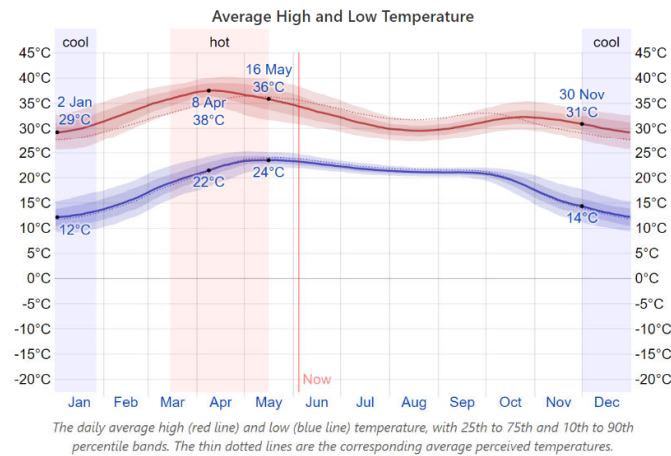

Karaye

Karaye, Kano, Nigeria

Interactive Map

Full Year Today

| Jan | Feb | Mar | Apr | May | Jun |
|-----|-----|-----|-----|-----|-----|
| Jul | Aug | Sep | Oct | Nov | Dec |

Summary

- Temperature
- Clouds
- Precipitation
- Sun
- Moon
- Humidity
- Wind
- Best Time to Visit
- Growing Season
- Solar Energy
- Topography
- Data Sources



Temperature

The hot season lasts for 2.3 months, from 17 February to 27 April, with an average daily high temperature above 36°C. The hottest day of the year is 28 March, with an average high of 38°C and low of 23°C.

The cool season lasts for 3.1 months, from 7 July to 10 October, with an average daily high temperature below 30°C. The coldest day of the year is 1 January, with an average low of 14°C and high of 32°C.

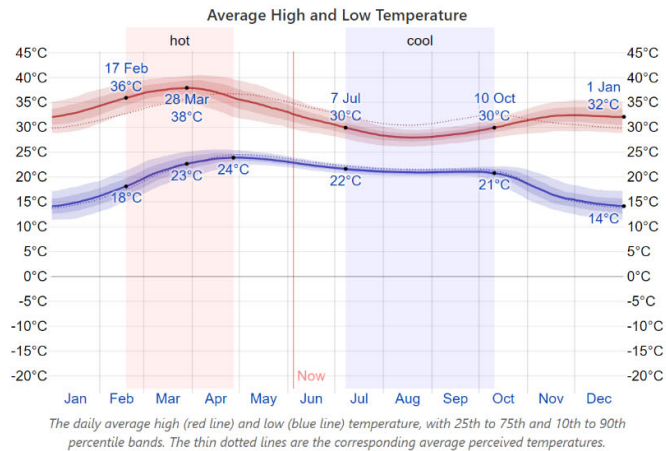

Gombe

Gombe, Gombe, Nigeria

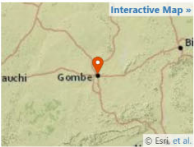

| Full Year |     |     |     |     |     |     |     |     |     |     |     |
|-----------|-----|-----|-----|-----|-----|-----|-----|-----|-----|-----|-----|
| Jan       | Feb | Mar | Apr | May | Jun | Jul | Aug | Sep | Oct | Nov | Dec |

- Summary
- Temperature
- Clouds
- Precipitation
- Sun
- Moon
- Humidity
- Wind
- Best Time to Visit
- Growing Season
- Solar Energy
- Topography
- Data Sources

Files S1–S3 are provided separately as Excel files.
